# Supplementary material for: Temporal Dynamics of Frailty and Depression Among Chinese Older Adults: A Hierarchical Age-Period-Cohort Analysis
Source: Research Square preprint supplement (doi:10.21203/rs.3.rs-8072834/v1), 2025-12-01
Supplement: Supplementary file 1 [file 658a3d89d4fcfeee804778fb.docx]

**Conceptual Definitions and Theoretical Foundations**

Conceptual Definitions

Health Status Among Older Adults

Health status among older adults refers to the overall level of physiological and psychological well-being within aging populations. According to the World Health Organization (WHO), health encompasses not merely the absence of disease or infirmity but also complete physical, mental, and social well-being[[[1]](#endnote-0)]. This conceptualization assumes particular salience for aging populations, as advancing age is accompanied by increasingly complex and multifaceted health challenges encompassing not only chronic disease burden and functional decline but also psychological well-being, social support network integrity, and lifestyle-related determinants.

Regarding physiological health, health status among older adults encompasses chronic disease management, maintenance of functional capacity, and nutritional optimization. Concerning psychological health, well-being involves emotional regulation, cognitive functioning, and social engagement. Psychological health extends beyond mere absence of psychiatric disorders to include adaptive environmental coping, maintenance of interpersonal relationships, and positive life orientation[[[2]](#endnote-1)]. In addition, social health is an important component of the health of older persons and includes, inter alia, social support, community participation and the suitability of the living environment[[[3]](#endnote-2)]. Social support not only attenuates psychological distress among older adults but also provides instrumental assistance regarding economic and daily living needs. Health among older adults represents a comprehensive, multidimensional construct encompassing functional status across physical, psychological, and social domains.

In the present study, health status among older adults was operationalized through two dimensions: physical health and psychological health, quantified respectively through frailty indices and depressive symptomatology measures. Within the framework of healthy aging, comprehensive understanding and rigorous definition of health among older adults can provide empirical foundations for policy formulation and resource allocation in aging societies.

Older people are healthy

Physical health status among older adults is primarily assessed and characterized through the construct of frailty. The concept of frailty was originally articulated in 1968[[[4]](#endnote-3)]. At the meeting, the WHO defined frailty as a clinically identifiable condition in older adults, characterized by heightened vulnerability stemming from age-related declines in physiological reserves and multi-organ system function, which impair their capacity to cope with daily or acute stressors[[[5]](#endnote-4)]. Combined with other factors, frailty can be defined as a fragile health state resulting from the complex interaction of physiological, psychosocial and environmental stressors, and associated with many adverse health outcomes[[[6]](#endnote-5)]. The concept of frailty involves three key elements. First, frailty is multifaceted, encompassing physical, social, and psychological factors. Second, while the prevalence of frailty increases with age, it is a natural part of the aging process. Third, frailty is dynamic, with elderly individuals experiencing fluctuations between mild and severe states[[[7]](#endnote-6)]. Although the definition of frailty is evolving, there is still no widely accepted gold standard in the medical community. In this study, frailty was quantified mainly through physiological indicators and used to analyze its changing trends in different ages, periods and cohorts.

Mental health of older adults

Depression serves as the primary indicator for assessing mental health in older adults. As a prevalent and serious mental health condition, it manifests through symptoms including persistent low mood, loss of interest, fatigue, difficulty concentrating, sleep disturbances, and chronic helplessness. These symptoms may occur individually or in combination. Not only does depression impair quality of life, but it may also lead to more severe health consequences such as worsening chronic conditions and reduced self-care abilities. The term "elderly depression" specifically refers to depressive symptoms occurring in individuals aged 60 and above.

In this study, elderly depression is characterized by depressive symptoms, reflecting the subjective experience of low mood in older adults. Recent epidemiological research has increasingly focused on "depressive symptoms" as a key analytical focus. These symptoms can be viewed as a sub-health state between wellness and illness. If left unaddressed for prolonged periods, they may progress to clinical depression, posing serious threats to both mental and physical health.

### Theoretical basis

Healthy aging theory

In its 2015 report, the WHO defined healthy aging as the process of developing and maintaining the functional capacity required for a healthy life in old age. The report emphasized the importance of maintaining health in older adults, expanding the concept of healthy aging to include both micro-environmental factors (such as living and family environments) and macro-environmental factors (such as building age-friendly societies[[[8]](#endnote-7)]. Healthy aging is conceptualized as a dynamic, multidimensional process aimed at attenuating age-related decline, reducing health-related burden, and enhancing overall quality of life across different life stages through health risk assessment and targeted interventions throughout the lifespan[[[9]](#endnote-8)].

Healthy aging theory posits that sustained health improvement throughout the aging process necessitates comprehensive health management strategies encompassing enhanced health literacy initiatives for aging populations, equitable healthcare resource allocation, psychological support provision, and optimization of social functioning. Research demonstrates that healthy aging pertains not merely to physiological health but is intrinsically interconnected with holistic development of psychological well-being and social functionality[[[10]](#endnote-9)].

Grounded in healthy aging theory, this research examined frailty and depressive symptomatology manifestations across diverse social strata from health promotion and disease prevention perspectives. Analyses investigated the influences of age, residential location, and educational attainment on frailty and depressive risk trajectories, with particular emphasis on identifying high-risk population subgroups and formulating targeted intervention strategies. From a health trajectory perspective, integrating age, period, and cohort effects, this study analyzed temporal patterns of health status evolution among aging populations and elucidated the dynamic manifestation of health challenges including frailty and depression across varying historical contexts.

The theory of active aging

The theory of active aging advocates providing the best opportunities for healthy, socially engaged and secure lives for older members of society, helping them live independently and with dignity, while improving their quality of life in later life[[[11]](#endnote-10)]. The core of this theory lies in enhancing the breadth and depth of social participation among older adults through multilevel support systems, thereby enabling integration across diverse societal domains including economic, cultural, and civic activities.

At the individual level, active aging theory aims to facilitate maintenance of physical and psychological health among older adults, fostering adaptive attitudes toward life transitions and attenuating quality of life decline to the greatest extent possible[[[12]](#endnote-11)]. At the population level, this theory emphasizes enhancement of the proportion of healthy older adults within the total aging population through health promotion and targeted interventions, thereby extending healthy life expectancy and ameliorating overall quality of life. At the societal level, active aging theory mandates that societies adopt health-conscious, sustainable, and proactive approaches toward population aging phenomena through construction of comprehensive social support systems and formulation of evidence-based policy frameworks, thereby ensuring equitable social participation opportunities and sufficient social welfare and healthcare resource provision for aging populations[[[13]](#endnote-12)].

From a health promotion perspective, this study analyzed the occurrence of frailty and depressive symptomatology across different age strata and birth cohorts, identifying high-risk populations and proposing intervention strategies. From a social participation perspective, the research examined the influences of family support and relational networks on psychological health among older adults. From a policy protection perspective, the study explored the protective effects of social policies on health outcomes among aging populations. Active aging theory provided systematic theoretical scaffolding for this research, facilitating formulation of policy recommendations to advance healthy aging initiatives.

Life Course Theory

Life course theory represents an integrative sociological and psychological framework emphasizing that individual development constitutes a cumulative product of sequential life events, role transitions, and social contextual influences. Originally systematized by Elder in 1974, this theoretical perspective posits that individual life trajectories are shaped not solely by chronological aging but through complex interactions among historical contexts, institutional structures, and geographic environments[[[14]](#endnote-13)].Core tenets of life course theory encompass temporality, time and place, sequencing of life events, and interdependence between individuals and social structures. This theoretical orientation underscores that individual development reflects not merely unique biographical trajectories but is fundamentally intertwined with social environments, cultural institutions, and family support systems.

Life course theory provides a theoretical foundation for understanding the dynamic evolution of health status. Health outcomes represent not merely biological transformations but are shaped by cumulative effects of early-life conditions—including educational opportunities and nutritional status—and critical life transitions such as employment trajectories and marital formation[[[15]](#endnote-14)]. Furthermore, socioeconomic contexts, political systems, and cultural norms across different eras and regions have significantly shaped individual health disparities. For instance, post-war-born seniors may face greater health risks in later life due to their childhoods marked by resource scarcity, while those raised during periods of rapid socioeconomic development tend to maintain relatively better health outcomes in their later years[[[16]](#endnote-15)].

In the present study, life course theory was employed to elucidate protracted effects of early-life conditions on late-life health outcomes. Educational attainment was examined as a critical early-life variable exerting cumulative influences on health status among older adults. The theory underscores the formative role of historical-social contexts in shaping individual development trajectories. This research analyzed differential socioeconomic conditions and healthcare resource accessibility experienced by older adults across distinct birth cohorts throughout their life courses; such factors, operating through cumulative mechanisms, generated substantial disparities in late-life health status among aging populations.

**References**

1. [] World Health Organization. Preamble to the Constitution of the World Health Organization as adopted by the International Health Conference[R]. New York:WHO, 1948-7-2. [↑](#endnote-ref-0)
2. [] Keyes C L M. The mental health continuum: From languishing to flourishing in life[J]. Journal of health and social behavior, 2002: 207-222. [↑](#endnote-ref-1)
3. [] Litwin H, Stoeckel K J, Schwartz E. Social networks and mental health among older Europeans: are there age effects?[J]. European Journal of Ageing, 2015, 12: 299-309. [↑](#endnote-ref-2)
4. [] O'brien T D, Roberts J, Brackenridge G R, et al. Some aspects of community care of the frail and elderly: the need for assessment[J]. Gerontol Clin (Basel), 1968, 10(4): 215-227. [↑](#endnote-ref-3)
5. [] World Health Organization. WHO clinical consortium on healthy ageing: topic focus: frailty and intrinsic capacity: report of consortium meeting, 1-2 December 2016 in Geneva, Switzerland[R]. World Health Organization, 2017. [↑](#endnote-ref-4)
6. [] Tocchi C. Frailty in older adults: an evolutionary concept analysis[J]. Research & Theory for Nursing Practice, 2015, 29(1). [↑](#endnote-ref-5)
7. [] Markle‐Reid M, Browne G. Conceptualizations of frailty in relation to older adults[J]. Journal of advanced nursing, 2003, 44(1): 58-68. [↑](#endnote-ref-6)
8. [] World Health Organization. World report on ageing and health[M]. World Health Organization, 2015. [↑](#endnote-ref-7)
9. [] Kendig H, Elias A M, Matwijiw P, et al. Developing age-friendly cities and communities in Australia [J]. Journal of Aging and Health, 2014, 26(8): 1390-1414. [↑](#endnote-ref-8)
10. [] Li L, Zhao M. Longitudinal study on health status of the elderly in China: Trends and determinants [J]. Aging & Mental Health, 2022, 26(5): 948-955. [↑](#endnote-ref-9)
11. [] World Health Organization. Active ageing: A policy framework[R]. World Health Organization, 2002. [↑](#endnote-ref-10)
12. [] Kendig H, Elias A M, Matwijiw P, et al. Developing age-friendly cities and communities in Australia[J]. Journal of Aging and health, 2014, 26(8): 1390-1414. [↑](#endnote-ref-11)
13. [] Walker A. A strategy for active ageing[J]. International social security review, 2002, 55(1): 121-139. [↑](#endnote-ref-12)
14. [] Elder Jr G H. Time, human agency, and social change: Perspectives on the life course[J]. Social psychology quarterly, 1994: 4-15. [↑](#endnote-ref-13)
15. [] Ben-Shlomo Y, Kuh D. A life course approach to chronic disease epidemiology: conceptual models, empirical challenges and interdisciplinary perspectives[J]. International journal of epidemiology, 2002, 31(2): 285-293. [↑](#endnote-ref-14)
16. [] Luo, Y., & Waite, L. J. (2005). The impact of childhood and adult SES on physical, mental, and cognitive well-being in later life. The Journals of Gerontology: Series B, 60(2), S93–S101. [↑](#endnote-ref-15)
