# Supplementary material for: Temporal Dynamics of Frailty and Depression Among Chinese Older Adults: A Hierarchical Age-Period-Cohort Analysis
Source: Research Square preprint supplement (doi:10.21203/rs.3.rs-8072834/v1), 2025-12-01
Supplement: Supplementary file 2 [file f397bbc1f88371ae9e3b331f.docx]

Age-Period-Cohort Model (APC Model)

The Age-Period-Cohort (APC) model represents a methodological approach for decomposing dynamic variations in health and social phenomena, enabling analysis of differential effects across age groups, historical periods, and birth cohorts. It is commonly employed to address confounding arising from multicollinearity among age, period, and cohort variables. Within the APC framework, observation time is stratified into distinct age groups, periods, and cohorts, with statistical methods employed to quantify their respective influences on outcomes of interest.

In public health research, APC modeling is frequently utilized for analyzing temporal trends in chronic disease incidence and mortality rates and for forecasting future disease burden trajectories. However, because age, period, and cohort exhibit perfect linear dependence (period = age + cohort), conventional regression approaches cannot yield unique parameter estimates—a problem termed the "identification problem."

Among diverse APC solutions, the Hierarchical Age-Period-Cohort Cross-Classified Random Effects Model (HAPC-CCREM) effectively addresses multicollinearity challenges. This approach demonstrates particular utility for analyzing large-scale longitudinal microdata. The HAPC framework assumes that fixed age, period, and cohort effects lack additivity, instead generating nested relationships that eliminate linear constraints among APC components, thereby circumventing identification issues. Critically, HAPC modeling enables statistical characterization of period- and cohort-specific contextual influences, illuminating how individual life experiences are shaped by environmental factors. Furthermore, relative to alternative solutions, HAPC modeling permits incorporation of additional covariates beyond age, period, and cohort to adjust models, thereby enabling examination of how other variables influence both outcome variables and APC effects[[[1]](#endnote-0)][[[2]](#endnote-1)].

Core APC Effects

The APC model encompasses three fundamental components:

Age Effects: Natural trajectories of health status changes with advancing chronological age, reflecting physiological aging processes.

Period Effects: Influences of specific historical periods' external environments—including policies and socioeconomic conditions—on health outcomes uniformly across all age groups.

Cohort Effects: Distinct social contexts and life conditions experienced by different birth cohorts generate enduring influences on health status throughout subsequent life stages.

Model Specification

To analyze influences of age, period, and cohort on frailty, depressive symptoms, and overall health while controlling for sociodemographic covariates—including sex, marital status, residential location, and educational attainment—the present study employed a two-level HAPC model.

Level One Model:

For each dependent variable Yijk, where Yijk represents either frailty, depression, or health status:

Yijk=β0jk+β1×age_ci+β2×age_c2i+eijk

Yijk represents the dependent variable (waning, depressive, or healthy) for the i-th individual at time period j in cohort k.

age_ci is the centralized age for the i-th individual.

Eijk : Random error term for each individual。

β1、β2： Represents the effect of age and age squared on the dependent variable

Two-level model: used to model period and queue random effects:Two-level model: used to model period and queue random effects:

β0jk=π0+p0j+c0k

π0 is the overall intercept.

p0j: Represents the random effect for period j, reflecting the time variation of the dependent variable.

Cok: Represents the random effect of queue k, reflecting intergenerational differences.

Extended model with control variables: Incorporate control variables (gender, marital status, place of residence, education) to assess their effects on physical decline, depression, and health.

Yijk=β0jk+β1×age_ci+β₂×age_c2i+β3×genderi+β4×marryi+β5×rurali+β6×edui+eijk

Latent Class Growth Analysis Model (LCGA Model)

Latent Class Growth Analysis (LCGA) represents a statistical methodology for analyzing underlying population heterogeneity in longitudinal data, characterizing individual trajectories across time. This model stratifies individuals into distinct latent classes, each representing unique health development trajectories, thereby revealing population heterogeneity in health status evolution. LCGA proves particularly suited for examining dynamic changes across multiple observation points, facilitating identification of differential trajectories in frailty, depressive symptomatology, and related health challenges among aging populations.

In gerontological health research, LCGA modeling enables characterization of divergent developmental pathways for frailty and depression. By stratifying older adults according to patterns of health change, researchers can identify population subgroups occupying distinct health states—a capability with substantial implications for designing targeted health interventions. In contrast to conventional linear regression approaches assuming homogeneous trajectories, LCGA illuminates complex, nonlinear health trajectories and captures population heterogeneity.

The principal advantage of LCGA lies in its capacity to capture individual developmental heterogeneity within population structures, thereby informing policymakers with precision-targeted health intervention directives. Through analysis of differential health trajectories among older populations, researchers can identify high-risk subgroups warranting intensified health management attention, providing theoretical scaffolding for individualized gerontological health interventions.

Latent Class Analysis of Health Status and Developmental Trajectories

To comprehensively elucidate heterogeneity in health status trajectories among aging populations, this study incorporated LCGA modeling to identify latent classes and characterize differential temporal patterns in frailty and depressive symptomatology. By stratifying individuals into distinct classes, LCGA revealed trajectory heterogeneity across population subgroups, thereby facilitating identification of groups exhibiting substantial variation in health status evolution.

Table 1 presents LCGA model comparison results for depressive symptom trajectories. The lcga1 model (single class) assumed uniform depressive trajectories across all individuals but demonstrated poor model fit with elevated BIC values. The lcga2 model (two classes) provided improved fit, revealing similar depressive trajectories for the majority with divergent patterns among a minority subgroup. The lcga3 model (three classes) demonstrated optimal fit with the lowest BIC value, stratifying the sample into Class 1 (low-level depressive symptoms), Class 2 (moderate depressive levels), and Class 3 (high-level depressive symptoms with significant temporal variation). The lcga3 model more precisely characterized depressive heterogeneity within aging populations, demonstrating superior utility for subsequent analysis and intervention strategy formulation.

Table 1 Results of the latent category model for depression levels

| Model | Classes | log-likelihood | Parameters | BIC | Class 1 (%) | Class 2  (%) | Class 3 (%) |
| --- | --- | --- | --- | --- | --- | --- | --- |
| lcga1 | 1 | -55594.27 | 2 | 111205.1 | 100 |  |  |
| lcga2 | 2 | -53193.45 | 4 | 106420.1 | 72.98 | 27.02 |  |
| lcga3 | 3 | -52708.14 | 6 | 105466.1 | 10.51 | 57.77 | 31.72 |

Table 2 presents LCGA model comparison results for frailty trajectories, stratifying frailty levels among aging populations into distinct latent classes. The lcga1 model (single class) assumed uniform frailty trajectories across all individuals, classifying the entire sample into one category (Class 1 = 100%) with poor model fit (log-likelihood = 22959.34, BIC = -45902.09). The lcga2 model (two classes) stratified individuals into two categories (Class 1 = 81.97%, Class 2 = 18.03%) with improved fit (log-likelihood = 25913.90, BIC = -51794.61). The lcga3 model (three classes) more precisely characterized frailty heterogeneity by stratifying individuals into Class 1 (6.35%), Class 2 (70.49%), and Class 3 (23.16%), demonstrating optimal model fit (log-likelihood = 26617.53, BIC = -53185.27). The lcga3 model provided superior fit and effectively captured differential frailty patterns across population subgroups.

Table 2 LCGA Model Comparison Results for Frailty Level Trajectories

| Model | Classes | log-likelihood | Parameters | BIC | Class 1 (%) | Class 2  (%) | Class 3 (%) |
| --- | --- | --- | --- | --- | --- | --- | --- |
| lcga1 | 1 | 22959.34 | 2 | -45902.09 | 100 |  |  |
| lcga2 | 2 | 25913.90 | 4 | -51794.61 | 81.97 | 18.03 |  |
| lcga3 | 3 | 26617.53 | 6 | -53185.27 | 6.35 | 70.49 | 23.16 |

1. [] Yang Y ,Land K C. A mixed models approach to the age-period-cohort analysis of repeated cross-section surveys,with an application to data on trends in verbal test scores [J].Sociological Methodology ,2006,36. [↑](#endnote-ref-0)
2. [] Yang Y,Land K C. Age-period-cohort analysis of repeated cross-section surveys: fixed or random effects?[J]. Sociological Method & Research,2008,36(3). [↑](#endnote-ref-1)
